# Supplementary material
Source: PubMed Central journal article supplement (PMC3742386)
Supplement: NIHMS482808-supplement-Supplementary_information.pdf [file NIHMS482808-supplement-Supplementary_information.pdf]

## **Supplemental information**

### **Title**

A long noncoding RNA contributes to neuropathic pain by silencing Kcna2 in primary afferent neurons

### **Authors**

Xiuli Zhao, Zongxiang Tang, Hongkang Zhang, Fidelis E. Atianjoh, Jian-Yuan Zhao, Lingli Liang, Wei Wang,

Xiaowei Guan, Sheng-Chin Kao, Vinod Tiwari, Yong-Jing Gao, Paul N. Hoffman, Hengmi Cui, Min Li, Xinzhong Dong,

and Yuan-Xiang Tao

**Supplemental Fig. 1** Expression of *Kcna2* antisense (AS) RNA in tissues and its whole sequence in rats

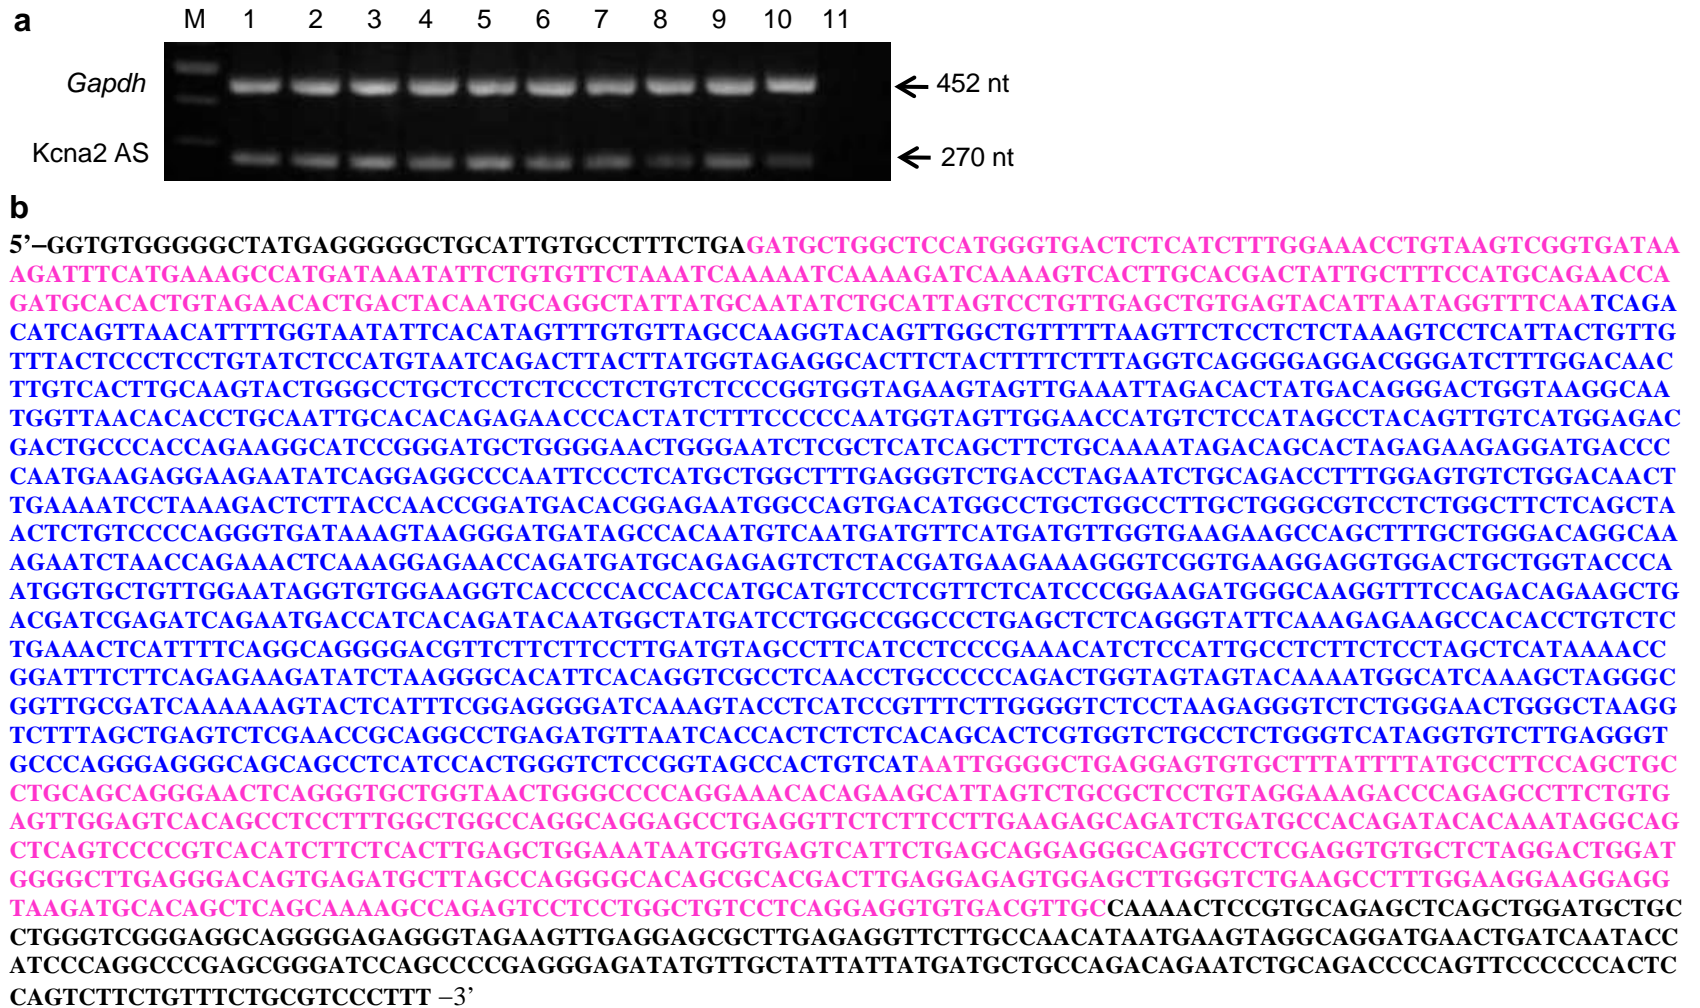

**Supplemental data Fig. 1:** (a) Reverse transcription-PCR analysis showing the expression of *Kcna2* antisense (AS) RNA in different tissues from normal rats. Lane 1: dorsal root ganglion. Lane 2: spinal cord. Lane 3: brainstem. Lane 4: hippocampus. Lane 5: cerebellum. Lane 6: cortex. Lane 7: heart. Lane 8: liver. Lane 9: lung. Lane 10: kidney. Lane 11: no-template control. Glyceraldehyde 3-phosphate dehydrogenase (*Gapdh*) was used as an internal control. n = 3 repeated experiments. M: a DNA ladder marker. (b) The full-length rat *Kcna2* AS cDNA sequence (2.52 kb). It contains a unique sequence at each end (black letters) and complementary sequence in the middle. The pink letters indicate sequences that are complementary to the 3' UTR and part of the 5' UTR of *Kcna2* cDNA, and the blue letters indicate the sequence complementary to the coding sequence of *Kcna2* cDNA. Translation analysis with DNAMAN software shows more than 30 stop codons distributed throughout the sequence of *Kcna2* AS cDNA.

**Supplemental Fig. 2** Expression of Kcna2 mRNA, Kcna2 protein, or Kcna2 AS RNA in L<sub>4</sub> DRG, L<sub>5</sub> DRG, or L<sub>5</sub> dorsal horn after peripheral nerve injury

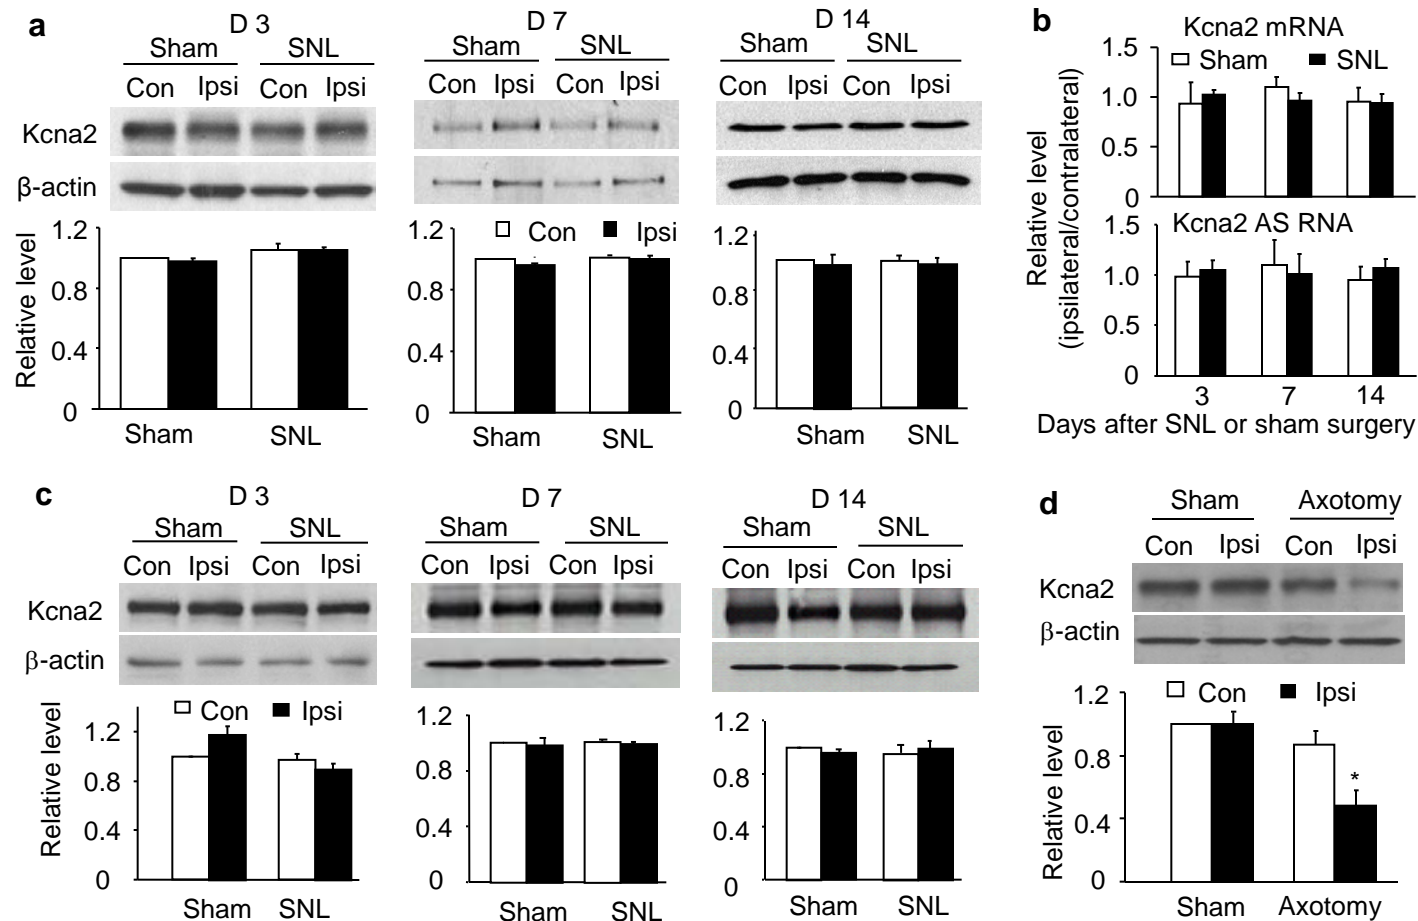

**Supplemental data Fig. 2:** (a) Western blot analysis revealed the expression of Kcna2 protein in the ipsilateral (Ipsi) and contralateral (Con) L<sub>4</sub> DRGs on days 3, 7, and 14 after L<sub>5</sub> SNL or sham surgery. n = 12 rats/group/time point. F = 0.51 for day 3, 0.71 for day 7, and 0.59 for day 14. (b) Quantitative real-time RT-PCR analysis showing the levels of Kcna2 mRNA and Kcna2 AS RNA in the ipsilateral and contralateral L<sub>5</sub> dorsal horns on days 3, 7, and 14 after L<sub>5</sub> SNL or sham surgery. n = 12 rats/group. F = 0.82 for mRNA and 0.79 for AS RNA. (c) Western blot analysis showing the expression of Kcna2 protein in the ipsilateral and contralateral L<sub>5</sub> dorsal horns on days 3, 7, and 14 after L<sub>5</sub> SNL or sham surgery. n = 12 rats/group/time point. F = 0.58 for day 3, 0.47 for day 7, 0.69 for day 14. (d) Western blot analysis shows a significant reduction in expression of Kcna2 protein in the ipsilateral L<sub>4/5</sub> DRGs on day 7 after sciatic nerve axotomy. n = 12 rats/group. F = 9.68. \*P < 0.05 vs the contralateral side from the sham group.

**Supplemental Fig.3** Mzf1 expression in Kcna2 AS RNA-containing DRG neurons and Mzf1 knockdown by its siRNA in HEK293T cells.

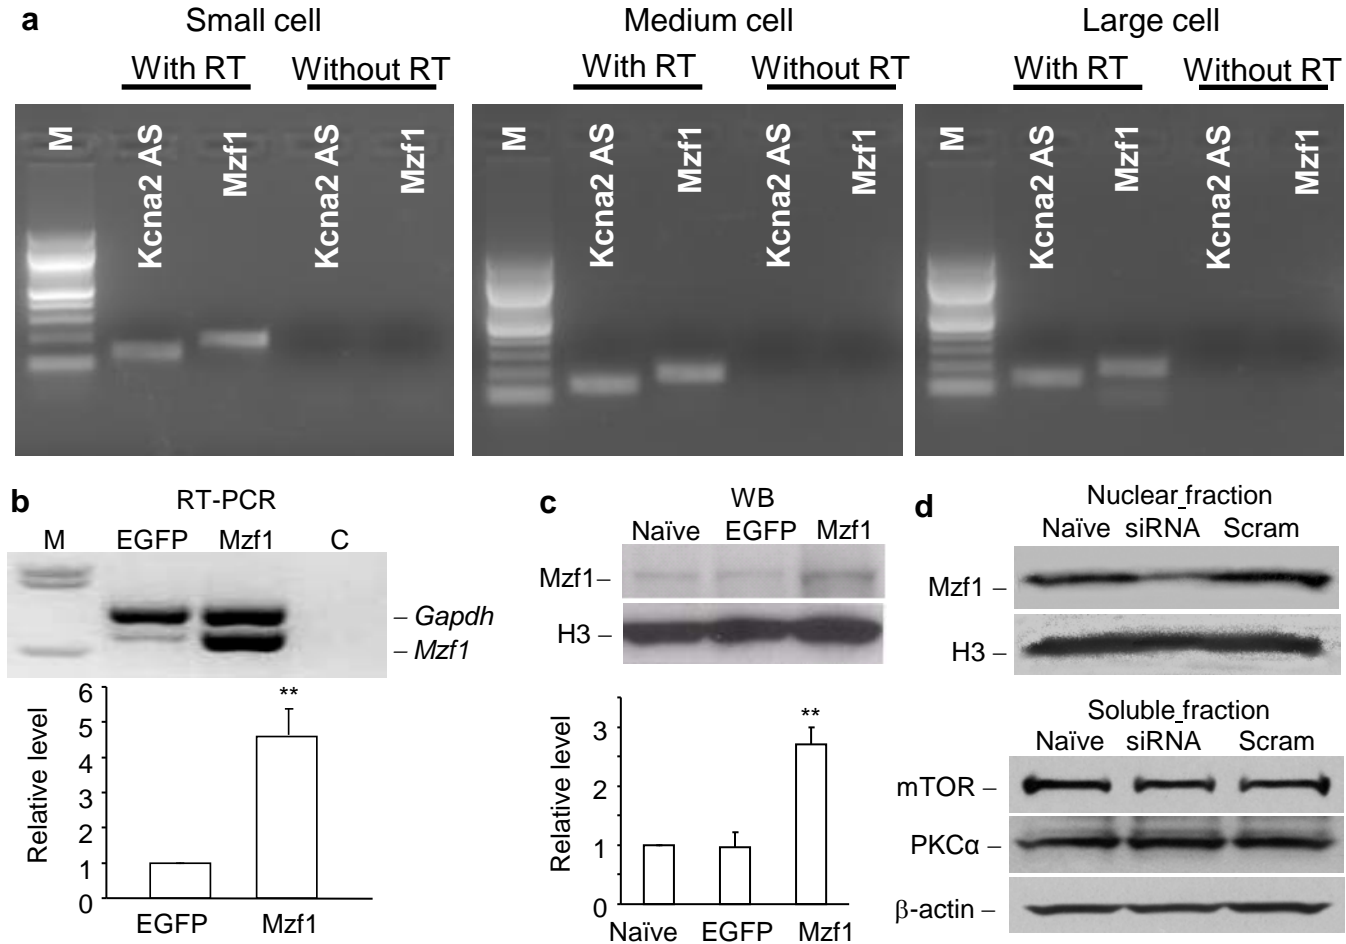

**Supplemental data Fig. 3:** (a) Co-expression of Kcna2 AS RNA with Mzf1 mRNA in small, medium, and large individual DRG neurons. Without RT primers, neither Kcna2 AS nor Mzf1 PCR products were detected in the DNase I-treated samples.  $n = 5$  repeats/cell. M: 100-bp ladder. (b) Expression of Mzf1 mRNA in HEK293T cells transfected with control EGFP vector or the full-length Mzf1 vector. Gapdh was used as a loading control.  $n = 3$  repeated experiments/treatment.  $t = -9.25$ .  $**P < 0.01$  vs the EGFP group. M: DNA ladder. C: no-template control. (c) Expression of Mzf1 protein in naïve HEK293T cell and HEK293T cells transfected with EGFP vector or the full-length Mzf1 vector. H3 was used as a loading control.  $n = 3$  repeated experiments/treatment.  $F = 20.87$ .  $**P < 0.01$  vs naïve group. (d) Mzf1 siRNA [but not scramble Mzf1 siRNA (Scram)] significantly knocks down Mzf1 protein expression but does not affect expression of nuclear protein H3 or cytosolic proteins mTOR, PKC $\alpha$ , and  $\beta$ -actin in HEK-293T cells.

**Supplemental Fig. 4** EGFP expression is limited in L<sub>5</sub> DRG and its fibers and terminals on the ipsilateral side 8 weeks after AAV5-EGFP injection into the left L<sub>5</sub> DRG.

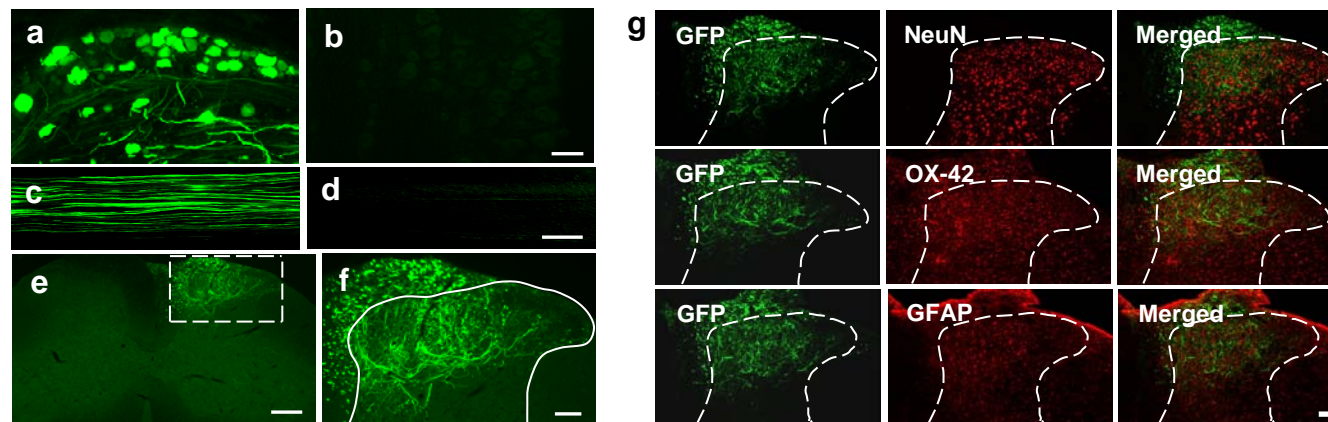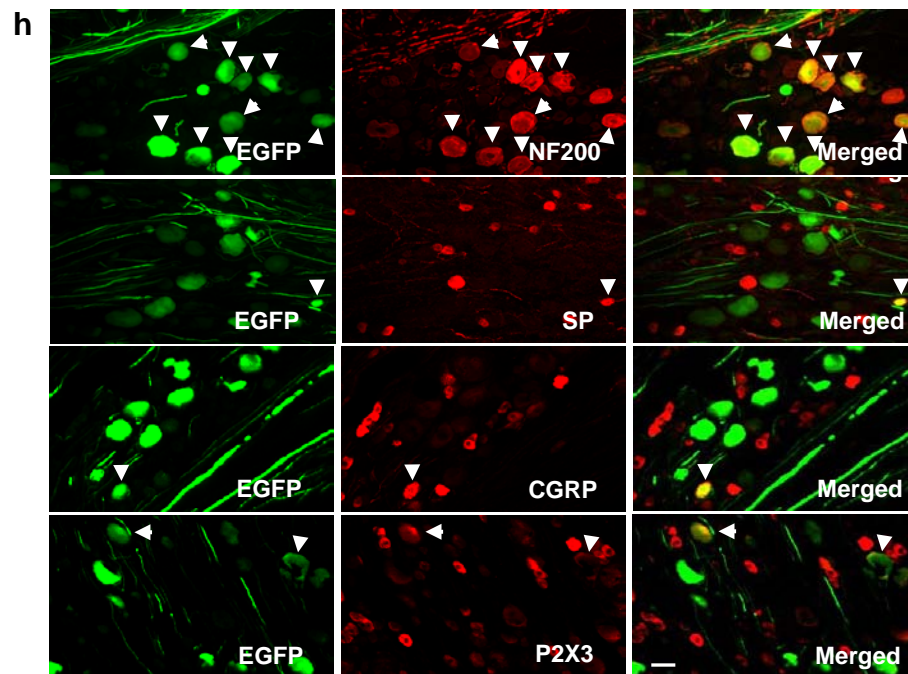

**Supplemental data Fig 4.** (a) Ipsilateral L<sub>5</sub> DRG. Approximately 60% ( $\pm 1.8\%$ ) of L<sub>5</sub> DRG neurons were labeled. (b) Contralateral L<sub>5</sub> DRG. (c) Ipsilateral sciatic nerve. (d) Contralateral sciatic nerve. (e) L<sub>5</sub> spinal cord dorsal horn. (f) High magnification of the outlined region from e. EGFP fluorescence was detected in many nerve fibers and terminals innervating the dorsal horn ipsilateral to the injection. No cell bodies of spinal cord neurons were labeled. (g) AAV5 does not cross central synapses. EGFP fluorescence did not co-localize with NeuN (a neuronal nuclear marker), OX-42 (a microglial marker), or GFAP (an astrocyte marker) in L<sub>5</sub> dorsal horn on the ipsilateral side. (h) Co-localization of EGFP expression with NF200, SP, CGRP, and P2X3 (arrows) in the L<sub>5</sub> DRG. n = 4-5 rats. Scale bars: 100  $\mu$ m in a, b, c, d, and e; 50  $\mu$ m in f; 200  $\mu$ m in g; 40  $\mu$ m in h.

**Supplemental Fig. 5** Kcna2 AS RNA overexpression in DRG reduces total Kv current density in medium, but not small, DRG neurons 8–12 weeks post-viral injection.

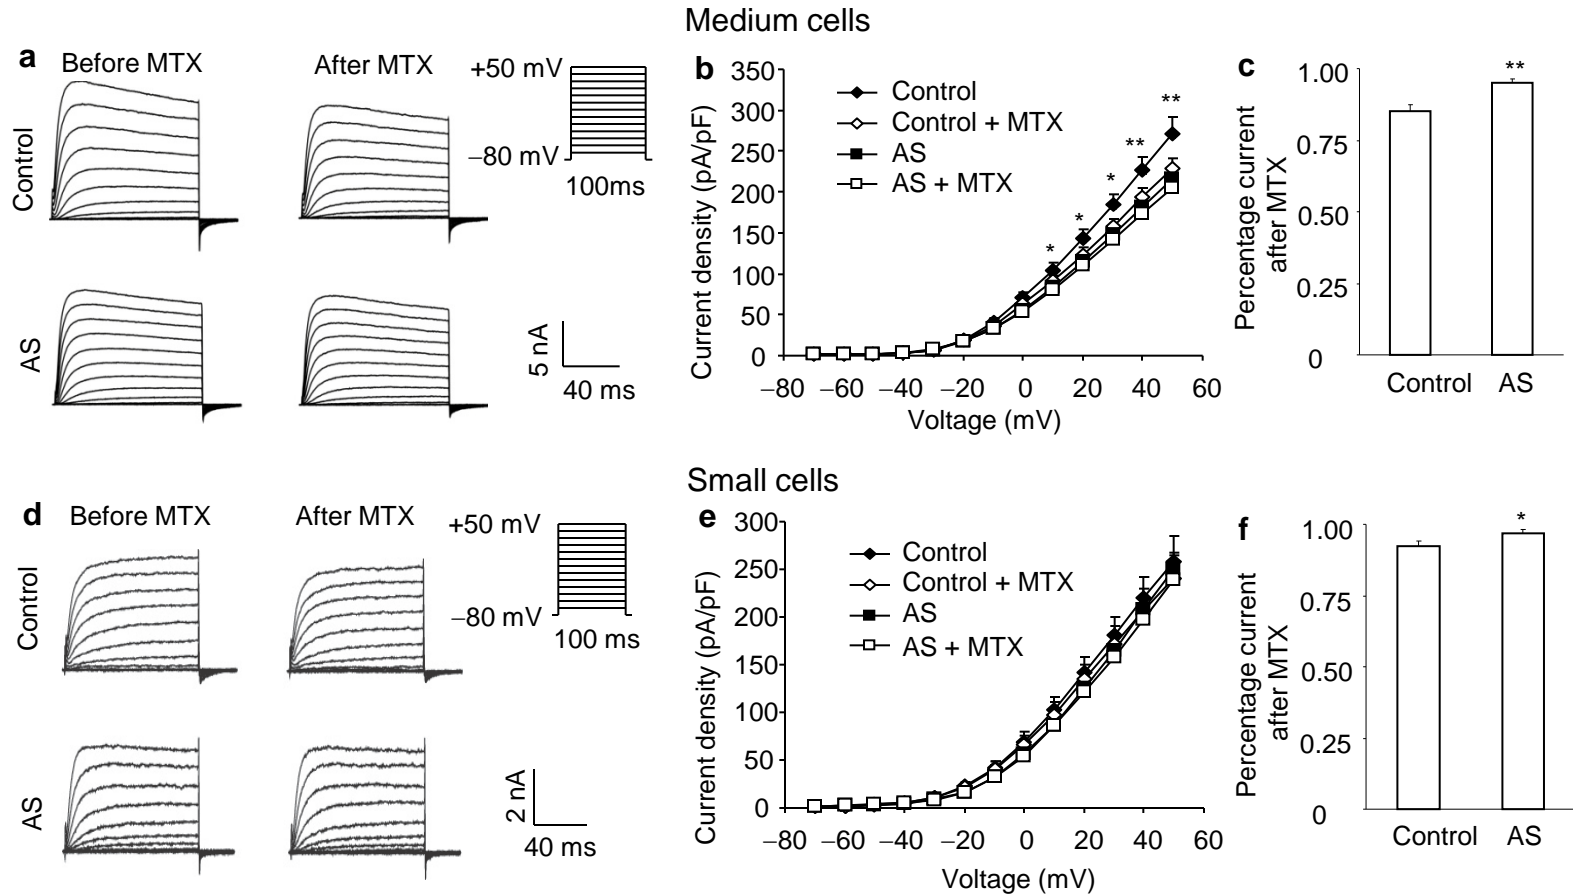

**Supplemental data Fig. 5:** (a) Representative traces of total Kv current in medium DRG neurons from control and AS-injected rats before or after bath perfusion of 100 nM MTX (b) I-V curve for control (n = 17 cells, 7 rats) and AS-treated (n = 15 cells, 8 rats) medium DRG neurons before or after 100 nM MTX treatment. The current density was plotted against each voltage.  $F = 117.99$ ,  $*P < 0.05$ ,  $**P < 0.01$  vs the AS group. (c) At +50 mV, reduction in total Kv current after MTX treatment in medium DRG neurons was greater in the control group (n = 17 cells, 7 rats) than in the AS-treated group (n = 15 cells, 8 rats).  $t = -6.54$ ,  $**P < 0.01$  vs control. (d) Representative traces of total Kv current in small DRG neurons from control and AS-treated rats before or after bath perfusion of 100 nM MTX. (e) I-V curve for control and AS-treated small DRG neurons before or after 100 nM MTX treatment. The current density was plotted against each voltage. n = 11 cells/group. (f) At +50 mV, reduction in total Kv current after MTX treatment in small DRG neurons was greater in the control group (n = 11 cells, 7 rats) than in the AS-treated group (n = 11 cells, 8 rats).  $t = -2.83$ ,  $*P < 0.05$  vs control.

**Supplemental Fig. 6** Inhibition of Kcna2 function increases neuronal excitability in rat large and medium DRG neurons.

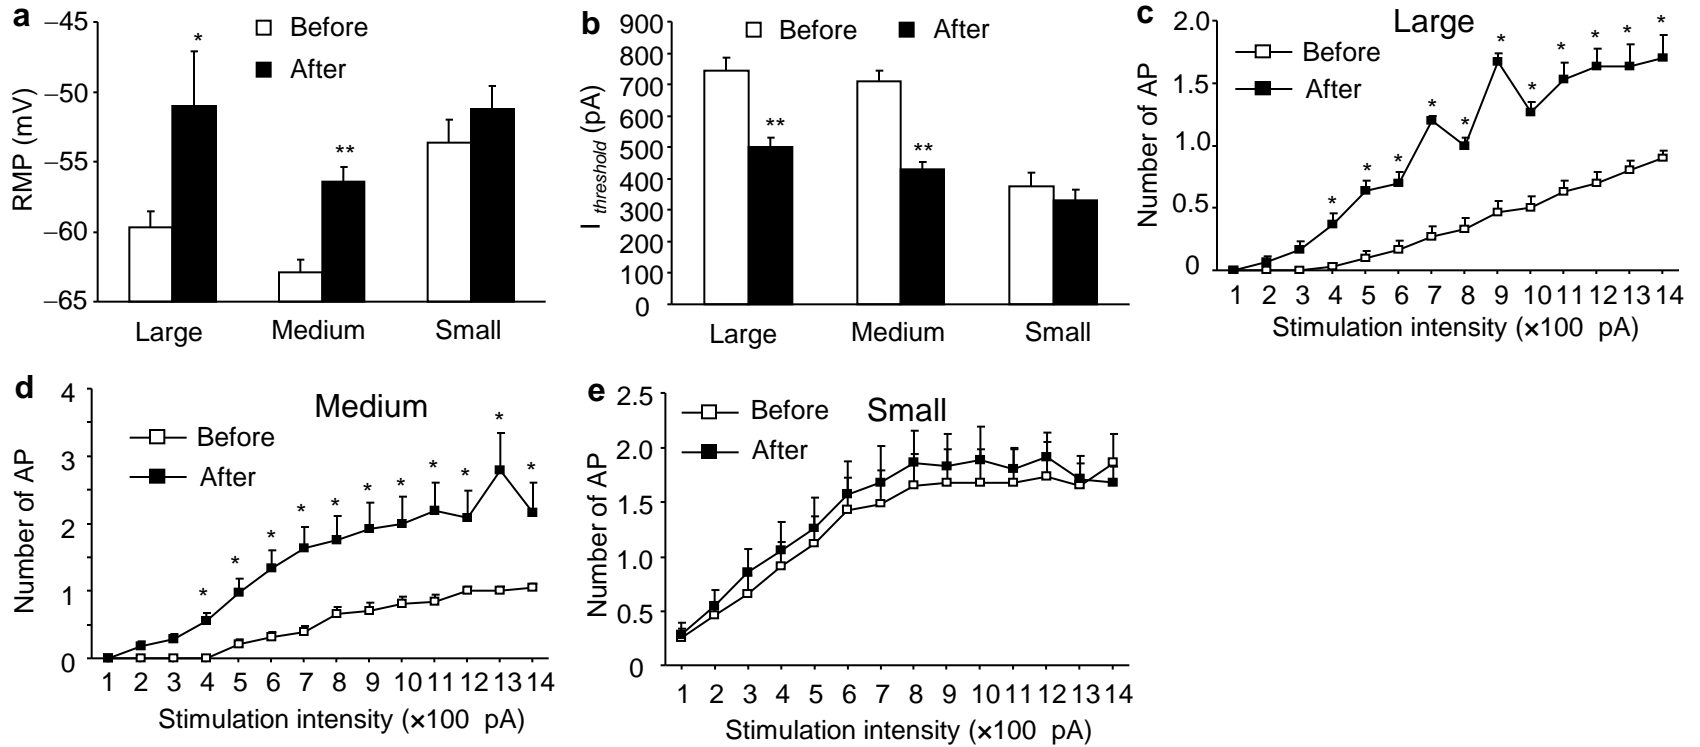

**Supplemental data Fig. 6:** DRG neurons were recorded before and 3–5 min after bath perfusion of 100 nM maurotoxin (MTX).  $n=30$  large cells, 38 medium cells, and 35 small cells from 7 naïve rats. **(a)** Resting membrane potentials (RMP) before and after bath perfusion of MTX.  $t = -2.17$  for large cells,  $-4.59$  for medium cells, and  $-1.03$  for small cells.  $*P < 0.05$ ,  $**P < 0.01$  vs the corresponding cells before MTX treatment. **(b)** Current threshold for pulses ( $I_{threshold}$ ) before and after bath perfusion of MTX.  $t = 4.60$  for large cells,  $7.25$  for medium cells, and  $0.77$  for small cells.  $**P < 0.01$  vs the corresponding cells before MTX treatment. **(c, d, e)** Numbers of evoked action potentials (APs) produced in large ( $F = 15.45$ ), medium ( $F = 17.18$ ), and small ( $F = 0.78$ ) DRG neurons before or after bath perfusion of MTX.  $*P < 0.05$  vs the same stimulation intensity before MTX treatment.

# Supplementary Fig. 7 Full-length pictures of the blots presented in the main figures

**Fig. 4b**

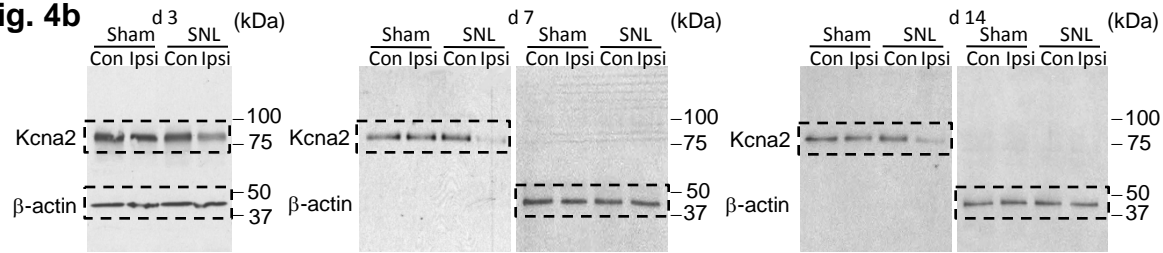

**Fig. 5b**

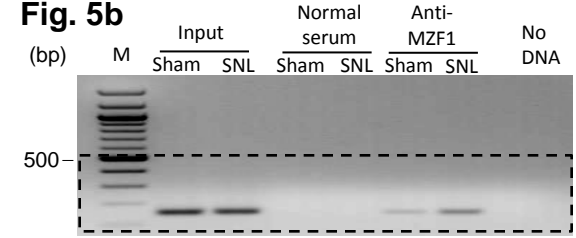

**Fig. 5c**

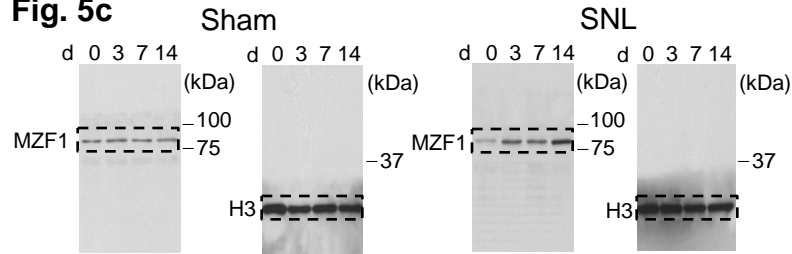

**Fig. 5f**

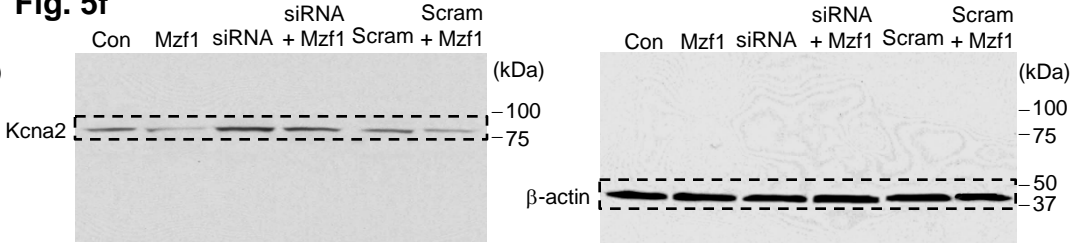

**Fig. 6a**

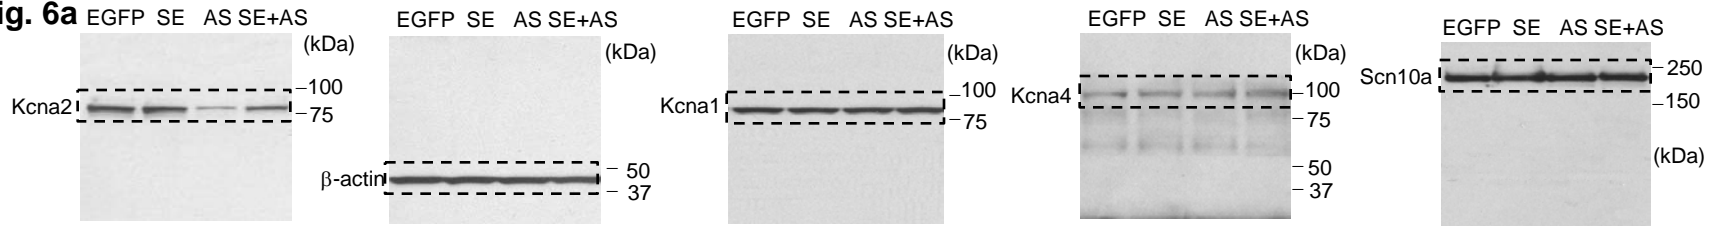

**Fig. 6d**

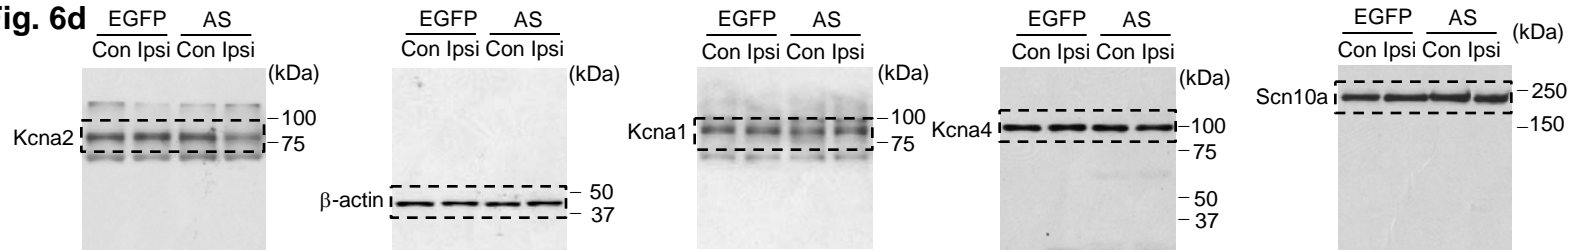

**Fig. 8b**

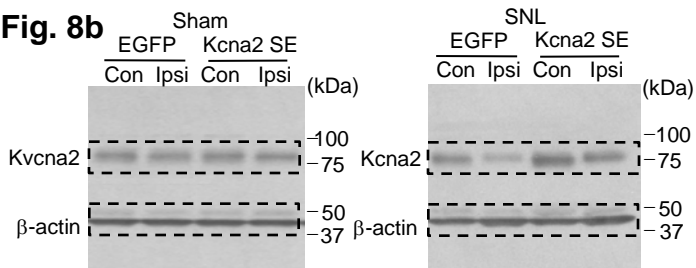



**Supplemental Fig. 8** SNL does not alter expression of glyceraldehyde 3-phosphate dehydrogenase (Gapdh) mRNA in the injured DRG.

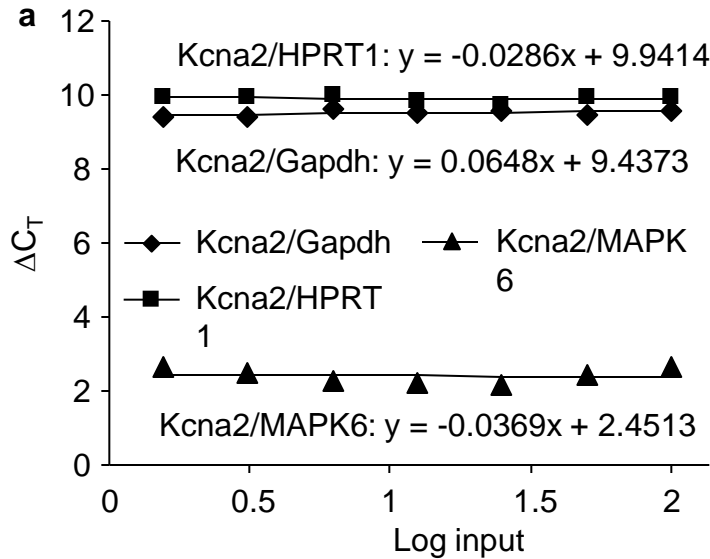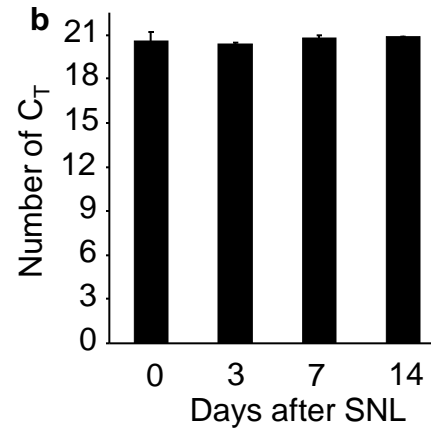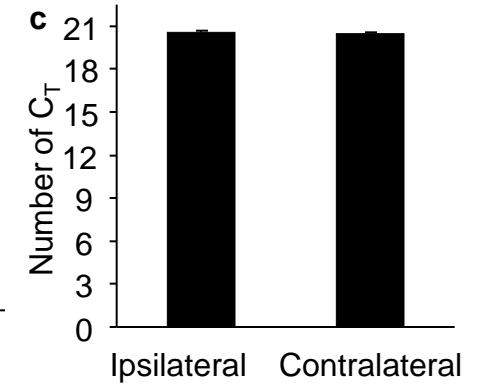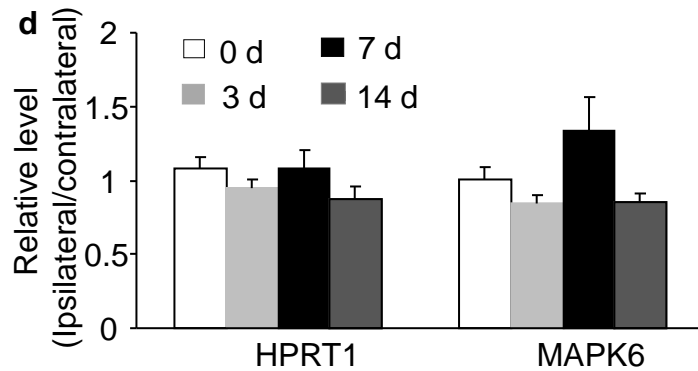

**Supplemental data Fig. 8:** (a) The amplification reactions of Kcna2 mRNA and three reference genes, Gapdh mRNA, hypoxanthine phosphoribosyltransferase 1 (HPRT1) mRNA, and mitogen-activated protein kinase 6 (MAPK6) mRNA have similar PCR efficiency. The  $\Delta C_T$  ( $C_T$  Kcna2 -  $C_T$  reference) values are plotted vs log inputs (RNAs, 1–100 ng). The absolute values of the three slopes of  $\Delta C_T$  vs log inputs were less than 0.1, indicating that the efficiency of four mRNA amplifications are approximately equal. (b) Quantitative real-time RT-PCR showed no difference in expression of Gapdh mRNA in the injured L<sub>5</sub> DRG on days 0 (naïve), 3, 7, or 14 after SNL.  $n = 6$  rats/time point.  $F = 2.17$  ( $P = 0.19$ ). (c) Quantitative real-time RT-PCR showed no difference in expression of Gapdh mRNA in the ipsilateral and contralateral L<sub>5</sub> DRGs on day 7 after SNL.  $n = 6$  rats.  $t = -1.63$  ( $P = 0.12$ ). (d) Quantitative real-time RT-PCR showed no difference in expression of Gapdh mRNA in the injured L<sub>5</sub> DRG on days 0 (naïve), 3, 7, or 14 after SNL, as evidenced by no significant alteration in ratios of ipsilateral-side mRNA level to contralateral-side mRNA level after normalization to either HPRT1 or MAPK6.  $n = 6$  rats/time point.  $F = 1.45$  ( $P = 0.29$ ) for HPRT1 and 3.45 ( $P = 0.071$ ) for MAPK6.

**Supplemental Table 1** Effect of Kcna2 AS RNA or MTX on membrane input resistance and other action potential parameters in the DRG

|                      | Large neurons     |       |                   |                |                  | Medium neurons    |                  |                   |                  |            | Small neurons     |           |                   |       |            |
|----------------------|-------------------|-------|-------------------|----------------|------------------|-------------------|------------------|-------------------|------------------|------------|-------------------|-----------|-------------------|-------|------------|
|                      | Control           |       | AS                |                | t/p value        | Control           |                  | AS                |                  | t/p value  | Control           |           | AS                |       | t/p value  |
| n                    | 39 cells, 12 rats |       | 43 cells, 14 rats |                |                  | 56 cells, 12 rats |                  | 72 cells, 14 rats |                  |            | 40 cells, 12 rats |           | 44 cells, 14 rats |       |            |
| R <sub>in</sub> , MΩ | 109.46            | 21.32 | 117.88            | 23.09          | -0.26/0.79       | 233.49            | 71.77            | 297.56            | 34.45            | -1.36/0.18 | 268.17            | 31.64     | 250.24            | 37.68 | 0.36/0.72  |
| APA, mV              | 98.13             | 2.86  | 93.8              | 2.54           | 1.13/0.26        | 100.07            | 1.67             | 101.88            | 1.04             | -0.97/0.33 | 93.63             | 2.32      | 98.88             | 2.58  | -1.5/0.14  |
| APT, mV              | -21.80            | 0.98  | -22.72            | 1.24           | 0.85/0.58        | -17.07            | 0.64             | -18.22            | 0.62             | 1.22/0.23  | -18.1             | 1.67      | -17.9             | 0.9   | -0.14/0.9  |
| APO, mV              | 40.32             | 2.3   | 39.45             | 2.02           | 0.29/0.77        | 37.78             | 1.79             | 40.19             | 1.17             | -1.42/0.16 | 36.63             | 1.83      | 41.11             | 2.37  | -1.5/0.14  |
| AHPA, mV             | -5.86             | 1.83  | -9.44             | 1.32           | 1.63/0.11        | -7.37             | 0.97             | -9.12             | 1.16             | 1.04/0.3   | -5.35             | 1.32      | -9.09             | 1.84  | 0.36/0.72  |
|                      | Large neurons     |       |                   | Medium neurons |                  |                   | Small neurons    |                   |                  |            |                   |           |                   |       |            |
|                      | Before MTX        |       | After MTX         | Before MTX     |                  | After MTX         | Before MTX       |                   | After MTX        | Before MTX |                   | After MTX | Before MTX        |       | After MTX  |
| n                    | 30 cells, 7 rats  |       | 30 cells, 7 rats  |                | 38 cells, 7 rats |                   | 38 cells, 7 rats |                   | 35 cells, 7 rats |            | 35 cells, 7 rats  |           |                   |       |            |
| R <sub>in</sub> , MΩ | 117.52            | 16.21 | 121.81            | 17.47          | -0.18/0.86       | 223.13            | 32.5             | 223.58            | 32.58            | -0.01/0.99 | 256.5             | 36.81     | 262.49            | 36.81 | -0.12/0.91 |
| APA, mV              | 96.68             | 1.09  | 100.54            | 1.84           | -1.81/0.08       | 102.34            | 2.9              | 100.41            | 1.29             | 0.61/0.55  | 99.82             | 1.18      | 98.51             | 1.54  | 0.68/0.5   |
| APT, mV              | -19.40            | 1.47  | -20.67            | 1.17           | 0.68/0.5         | -18.48            | 0.95             | -19.22            | 1.11             | 0.5/0.62   | -20.78            | 0.99      | -21.33            | 0.89  | 0.41/0.69  |
| APO, mV              | 36.90             | 1.09  | 35.13             | 2.83           | 0.59/0.56        | 36.43             | 1.67             | 38.43             | 1.34             | -0.99/0.32 | 43.79             | 2.03      | 45.07             | 1.3   | -0.53/0.6  |
| AHPA, mV             | -5.25             | 1.71  | -8.09             | 1.04           | 1.4/0.17         | -7.64             | 0.96             | -9.48             | 0.81             | 1.47/0.15  | -7.69             | 1.71      | -7.6              | 1.69  | 0.04/0.97  |

Values are mean ± SEM. R<sub>in</sub>: membrane input resistance. APA: action potential amplitude. APT: action potential threshold. APO: action potential overshoot. AHPA: afterhyperpolarization amplitude.

## Supplemental table 2 All primers and probes used

| Names                    | Sequences                                    | Names                         | Sequences                                            |
|--------------------------|----------------------------------------------|-------------------------------|------------------------------------------------------|
| <b>RT-PCR</b>            |                                              | <b>Real-time RT-PCR</b>       |                                                      |
| Rat-Kcna2 AS-RT          | 5'-CGTCACACCTCCTGAGGACAG-3'                  | <u>Kcna2</u><br>RT            | 5'-CGTCACACCTCCTGAGGACAG-3'                          |
| Rat-Kcna2 AS-F           | 5'-CTGCCCCAGACTGGTAGTA-3'                    | <u>AS RNA</u><br>Probe        | 5'-/56-FAM/TGCTGTTGGAATAGGTGTGGAAGGT/BHQ_1/-3'       |
| Rat-Kcna2 AS-R           | 5'-CCCAGTGGATGAGGCTGCTG-3'                   | PCR-F                         | 5'-AGAAAGGGTTCGGTGAAGGAGGT-3'                        |
| Mouse-Kcna2 AS-RT        | 5'-TCTCCTCCTCAAGTCGTGGTGC-3'                 | PCR-R                         | 5'-GTGTGGCTTCTCTTTGAATACC-3'                         |
| Mouse-Kcna2 AS-F         | 5'-TTCCAGACAGAAGCTGACGA-3'                   | <u>Kcna2</u><br>RT            | 5'-GGGTGACTCTCATCTTTGGA-3'                           |
| Mouse-Kcna2 AS-R         | 5'-ACCTGTGAACGTGCCCTTAG-3'                   | <u>mRNA</u><br>Probe          | 5'-/56-FAM/TGCTGTTGGAATAGGTGTGGAAGGT/BHQ_1/-3'       |
| Human/monkey-Kcna2 AS-RT | 5'-ACTCACCATTATTTCTAGCTCG-3'                 | PCR-F                         | 5'-GTGTGGCTTCTCTTTGAATACC-3'                         |
| Human/monkey-Kcna2 AS-F  | 5'-TCTAAGGCACATTCACAGGTC-3'                  | PCR-R                         | 5'-AGAAAGGGTTCGGTGAAGGAGGT-3'                        |
| Human/monkey-Kcna2 AS-R  | 5'-TGTTGGTGCATCTCAGATTCCT-3'                 | RT                            | 5'-AAAGTATCTACAGAGTGGGACA-3'                         |
| Rat-Gapdh-RT             | 5'-GAGGGTGCAGCGAACTTTATTGAT-3'               | <u>Kcna1</u><br>Probe         | 5'-/56-FAM/AGTCATCTACACTTCTAACATCTTCACAGAC/BHQ_1/-3' |
| Mouse-Gapdh-RT           | 5'-GAGGGTGCAGCGAACTTTATTGAT-3'               | PCR-F                         | 5'-GACTTCACGGGCACCATTCAC-3'                          |
| Human/Monkey-Gapdh-RT    | 5'-GAGCACAGGGTACTTTATTGAT -3'                | PCR-R                         | 5'-TCAAAAAGAGAACCAGATGATACAC-3'                      |
| Gapdh-F                  | 5'-ACCACAGTCCATGCCATCAC-3'                   | RT                            | 5'-TGTTTTTATCTGCTCGCTGTCA -3'                        |
| Gapdh-R                  | 5'-TCCACCACCTGTTGCTGTA-3'                    | <u>Kcna4</u><br>Probe         | 5'-/56-FAM/CTTCTCTTCCCTGGGGGACA /BHQ_1/-3'           |
| Rat-Mzf1-RT              | 5'-TCACCGCAGTGGTAGGGCTTTTCG-3'               | PCR-F                         | 5'-CCCATACCTACCTTCTAAATTTGC -3'                      |
| Rat-Mzf1-F               | 5'-AGGTGAAAGAGGAGTCAGAGGTTA-3'               | PCR-R                         | 5'-TGTTTTTATCTGCTCGCTGTCA -3'                        |
| Rat-Mzf1-R               | 5'-GATCCTCGTCCGTGGGGTCTGTT-3'                | <u>Gapdh</u><br>RT            | 5'-GAGGGTGCAGCGAACTTTATTGATG-3'                      |
| <b>Cloning</b>           |                                              | Probe                         | 5'-/56-FAM/ATCAACGGGAAACCCATCACCATCTT/BHQ_1/-3'      |
| <u>Kcna2 AS</u><br>RT    | 5'-CGTCACACCTCCTGAGGACAG-3'                  | PCR-F                         | 5'-TCGGTGTGAACGGATTTGGC-3'                           |
| PCR-F                    | 5'-CCTGTAAGTTCGGTGATAAA-3'                   | PCR-R                         | 5'-CCTTCAGGTGAGCCCCAGC-3'                            |
| PCR-R                    | 5'-TACCTCCTTCCCTCCAAA-3'                     | RT                            | 5'-AAGCTTGCTGGTGAAGGA-3'                             |
| N-PCR-F                  | 5'-GGCTCCGGAGGATGACACGGAGAATGG-3'            | Probe                         | 5'-/56-FAM/AAATTCAGACAAGTTTGTGTTGG/BHQ_1/-3'         |
| N-PCR-R                  | 5'-ATAGTTTAGCGGCCGCCTCGAGGACCTGCCCTCTGCT-3'  | PCR-F                         | 5'-AAGCTTGCTGGTGAAGGA-3'                             |
| <u>Kcna2 SE</u><br>RT    | 5'-GGGTGACTCTCATCTTTGGA-3'                   | PCR-R                         | 5'-CCGCTGCTTTTAGGCTTTG-3'                            |
| PCR-F                    | 5'-CAGGAACATGGAGGCTCGGGTAC-3'                | RT                            | 5'-TAAAGCCATTGACATGTGGG-3'                           |
| PCR-R                    | 5'-CACTGACTACAATGCAGGCTATT-3'                | Probe                         | 5'-/56-FAM/ACCCTCTTTGCAGGTGCACATGAAC/BHQ_1/-3'       |
| N-PCR-F                  | 5'-GGCTCCGGATCGAGGACCTGCCCTCTGCT-3'          | PCR-F                         | 5'-TAAAGCCATTGACATGTGGG-3'                           |
| N-PCR-R                  | 5'-ATAAGAATPCGGCCGCAGCAGCCTCATCCACTGGG-3'    | PCR-R                         | 5'-TCGTGCACAACAGGGATAGA-3'                           |
| <u>Mzf1</u><br>RT        | 5'-CTGCGTAAGCCAGAAGTATTGT-3'                 | <b>RACE</b>                   |                                                      |
| PCR-F                    | 5'-GACAGACACTGGCCTCAAAGAC-3'                 | <b>Extended primers</b>       |                                                      |
| PCR-R                    | 5'-GGTTGGGGAAGCATTATCTATT-3'                 | Rat-Kcna2 AS-RT               | 5'-CGTCACACCTCCTGAGGACAG-3'                          |
| N-PCR-F                  | 5'-TGTTCTAGAGCCACCATGAAACCCATTGTGCCAGACTC-3' | Rat-Kcna2 AS-F                | 5'-CCTGTAAGTCGGTGATAAA-3'                            |
| N-PCR-R                  | 5'-TCAGTGCAGTACCCTACTCAGTGTGTTGCGTT-3'       | Rat-Kcna2 AS-R                | 5'-TACCTCCTTCCCTCCAAA-3'                             |
| <b>EMSA</b>              |                                              | <b>5'-end primers</b>         |                                                      |
| Minizmal probe           | ATGGTCCTCTCAATGCGAAAAGTGGGGATGACCTTTGGAGTCG  | SP1 for RT                    | 5'-CAACTGTACCTTGCTAACA-3'                            |
| Mutant probe             | ATGGTCCTCTCAATGCGAAAAGTGGATGACCTTTGGAGTCG    | 5' Oligo Td-Anchor primer     | Provided by 5' RACE kit (03353621001)                |
|                          |                                              | SP2 for the first nested PCR  | 5'-CTGCATTGTAGTCAGTGTTC-3'                           |
|                          |                                              | 5' PCR anchor primer          | Provided by 5' RACE kit (03353621001)                |
|                          |                                              | SP3 for the second nested PCR | 5'-GCATGGAAGCAATAGTCGT-3'                            |
|                          |                                              | <b>3'-end primers</b>         |                                                      |
|                          |                                              | 3' end RT/R primer            | 5'-GAGCATGCGGCCGCTAAGAACAGTG-3'                      |
|                          |                                              | Rat-Kcna2 AS-F                | 5'-AGGGAAGTCAAGGGTGTGGTAA-3'                         |
|                          |                                              | 3' RNA adapter                | 5'-phosphate-UUCACUGUUCUUAGCGGCCGAUGCUC-idT-3'       |

RT: Reverse-transcription. F: Forward. R: Reverse. N-PCR: Nested PCR. Underlined letters: the restriction enzyme recognition sites.
